# Mesocosm experiments reveal the loss of migratory tendencies in a recently isolated population of three-spined sticklebacks

A. Ramesh<sup>1\*</sup>✉, J. Gismann<sup>1</sup> ✉, T.G.G. Groothuis<sup>1</sup>, F.J. Weissing<sup>1</sup> and M. Nicolaus<sup>1</sup>

1. Groningen Institute for Evolutionary Life Sciences, University of Groningen, Nijenborgh 7, 9747 AG Groningen, The Netherlands

\*Corresponding author. E-mail: [a.ramesh@rug.nl](mailto:a.ramesh@rug.nl)

✉ Shared first authorship

ORCID:

A. Ramesh: 0000-0002-7200-1366,

J. Gismann: 0000-0002-2570-590X,

T.G.G. Groothuis: 0000-0003-0741-2174,

F.J. Weissing: 0000-0003-3281-663X,

M. Nicolaus: 0000-0003-1808-1526

18 **Abstract**

19 In the 1970s, water management in the Netherlands resulted in numerous isolated populations of three-spined  
20 sticklebacks, which can no longer migrate from freshwater to the sea. We tested whether ~50 years of isolation  
21 resulted in reduced migratory tendencies in these ‘resident’ sticklebacks. Lab-based individual testing showed  
22 behavioural divergence between residents and migrants, but also produced counter-intuitive results, especially  
23 with regards to movement tendencies. To detect differences in migration tendencies, we set up a semi-natural  
24 mesocosm, consisting of connected ponds, where movements of numerous individuals could continually be  
25 tracked at larger spatial scales. We found that wild-caught residents and migrants exhibited no differences in  
26 movement tendencies ‘within ponds’, but residents moved significantly less ‘between ponds’ than migrants.  
27 Between-pond movements were consistent and the observed differences were robust across contexts (changes  
28 in water flow and group size). Our study reveals that larger-scale movement tendencies can diverge over short  
29 time scales in response to human-induced isolation, and highlights the importance of observing behaviour in  
30 ecologically relevant setups that bridge the gap between lab and field studies.

31  
32 **Keywords:** animal personality, migration, population divergence, rapid evolution, RFID, semi-natural  
33 conditions.

## 34 Introduction

35 Habitat fragmentation is one of the major threats for biodiversity, particularly for migratory species that  
36 depend on multiple habitats to complete their life cycle (1). In the north of the Netherlands, pumping stations  
37 have disrupted the connectivity between marine and riverine habitats, confining some fish populations to  
38 freshwater habitats without the possibility to migrate to the sea. Such forced isolation can cause rapid  
39 phenotypic responses and life-history changes (mammals and birds: (2); fish: (3–6)). Using individual lab-  
40 based assays, we have previously shown that this is indeed true for three-spined sticklebacks (*Gasterosteus*  
41 *aculeatus*): ‘resident’ populations, isolated for ~50 years, were found to diverge in morphology and in  
42 behaviour from their ‘migrant’ ancestors (7), with part of the divergence having a genetic basis (8). Regarding  
43 movement-related behaviours, population differences uncovered in the lab were surprising at first because  
44 residents, that were expected to exhibit lower movement tendencies than migrants, were instead more active  
45 and more exploratory (7). We hypothesized at that time that this may be due to stress, induced by testing in  
46 social isolation, which might have affected wild-caught migrants disproportionately more than wild-caught  
47 residents, as migrants are thought to shoal extensively as an anti-predator strategy to higher predation risk in  
48 the open sea. Alternatively, small-scale experimental settings in the lab may not be suited to study larger-scale  
49 processes like migration. More generally, for wild-caught animals, lab conditions necessarily present a novel  
50 environment and fail to mimic natural complexity in biotic and abiotic factors, including the animals’ social  
51 environment (9–12). However, studying dispersal or migration behaviour in the field is often logistically  
52 challenging (especially in aquatic environments and for small fish) and frequently lacks data about the  
53 animals’ social groups (13).

54 To bridge the gap between lab and field studies, we set up a semi-natural mesocosm consisting of  
55 connected ponds, in which groups of fish can be remotely tracked over extensive periods of time. We here  
56 report the first experiment that aimed to test for consistent differences in movement tendencies between wild-  
57 caught ‘resident’ and ‘migrant’ sticklebacks and to disentangle the effects of spatial scale (within and between  
58 ponds), social environment (group size), and ecological conditions (water flow) on movement patterns. The  
59 results of the second experiment, aimed at disentangling genetic and non-genetic effects, are reported in (8).  
60 Under these experimental conditions, we tested (a) if residents and migrants exhibit differences in their

61 movement tendencies, (b) if the spatial scale of movement matters, and (c) how consistent these patterns are  
62 under varying conditions (group size and water flow).

## 64 **Methods**

### 65 *Mesocosm system*

66 The mesocosm consists of two independent systems of five ponds (each Ø 1.6m, with water depth of 80cm),  
67 connected linearly with opaque corridors (each of length ~1.5m and Ø 11cm), spanning a linear distance of  
68 ~14m (Fig.1). The system is supplied with freshwater from a natural ditch, with the possibility of creating  
69 water flow (~0.7cm/s), mimicking the wild conditions, which also acts a cue for migration (14). This system  
70 allowed to measure the movement of individual sticklebacks within and between ponds. The first pond  
71 (labelled 1 in Fig.1), enriched with plastic plants, was used to quantify within-pond movements, while the  
72 whole system of five connected ponds was used to record between-pond movement tendencies (see details in  
73 Supp. info.1).

74 We used a Radio-Frequency-Identification (RFID) system consisting of circular RFID antennas (Ø  
75 10cm), data loggers and Passive Integrative Transponders (PIT tags) (*Trovan, Ltd., Santa Barbara, California*)  
76 to record movements of tagged sticklebacks (details in Supp. info.2). Nine circular antennas were placed in  
77 the first pond to record within-pond movements and two antennas were placed at both ends of each of the four  
78 connecting corridors to measure between-pond movement tendencies (Fig.1). Each antenna records the unique  
79 PIT-tag ID of the fish along with a time stamp, stored on a USB drive in the central data logger. The sensitivity  
80 of the system was set to three reads per second per unique tag. In a pilot study, we validated the reads using  
81 video recordings and found that it corresponded well with the entry and exit times of fish.

### 82 *Experiment-1*

83 We created five groups of migrants and six groups of residents, each consisting of 10 randomly selected  
84 individuals (total:  $N_{mig}=49$  and  $N_{res}=60$ ). While we always tried to maintain the group size to 10 fish, tag-  
85 loss and other technical difficulties led to one group of migrants having nine fish and another with 11 fish.  
86 Groups were housed in separate small holding ponds for 24 hours before the start of the experiment. On the  
87 experimental day, one resident and one migrant group were released simultaneously (to avoid temperature or

88 seasonal biases) into separate mesocosms. The individuals in each group were first monitored for within-pond  
89 movement by confining the fish to the starting pond for the first five hours (Fig.1) and then for between-pond  
90 movement for ~16.5 hours, after opening the connection to the other ponds (Fig.1; Supp. info.2).

### 91 *Experiment-2*

92 In a next step (after ~one month), we combined all migrants and, separately, all residents (after excluding 12  
93 fish which either had died or lost tags) into two large groups ( $N_{mig}=45$ ,  $N_{res}=52$ ) and quantified between-  
94 pond movements in these two groups in the same separate mesocosm setups over four days. In addition, we  
95 alternated flow and no-flow conditions on consecutive days (see Supp. info.1).

### 96 *Analyses*

97 For each individual, we quantified within-pond movement as the number of times a fish crossed different  
98 bottom and surface antennas separately (Fig.1). We deemed the number of separate visits to a particular  
99 antenna unreliable for measuring movement patterns because fish that stayed longer near an antenna were  
100 recorded as multiple disconnected set of reads, as if they visited the antenna multiple times. Between-pond  
101 movement was quantified as the number of crosses a fish made through the corridors connecting two ponds  
102 (Fig.1). Fish that did not get detected by any antenna were given a score of zero crosses.

103 We then analysed if residents and migrants differed in the number of crosses for within- and between-  
104 pond movements (Experiment-1) and whether they were consistent across contexts (group size and flow)  
105 (Experiment-2). Briefly, we considered the number of crosses within or between ponds as response variable  
106 separately in univariate generalized linear mixed models with Poisson errors. In all models, we included *origin*  
107 (resident vs. migrant) as a fixed factor and *group-ID* and an observation-level '*Obs*' (Observation-level  
108 random effects to control for overdispersion, (15)) as random effects. For Experiment-2, *treatment* (flow vs.  
109 no flow) and its interaction effect with *origin* were added as fixed effects and *individual-ID* as a random effect  
110 to account for individual repeats. Additionally, we analysed whether the fraction of fish that did not exit the  
111 first pond differed between migrants and residents using Fisher's exact test. Repeatability and correlation of  
112 number of crosses across contexts were also calculated (Supp. info.3). All analyses were carried out in R v.  
113 4.1.0, R Core Team (2019). For complete description of the analyses see Supp. info.3.

115 **Results**

116 In Experiment-1, residents and migrants showed a broad distribution of number of crosses at both bottom and  
117 top antennas (Fig.2a, b) and the differences between the groups were in both cases not statistically significant  
118 (Table 1; Median bottom-antenna crosses: Residents=23, Migrants=14; Median top-antenna crosses:  
119 Residents=3.5, Migrants=8). In contrast, residents exhibited much lower numbers of crosses between ponds  
120 than migrants (Fig. 2c; significant effect of *Origin* in Table 1; Median pond crosses: Residents=0,  
121 Migrants=16). Furthermore, the proportion of ‘non-leavers’, i.e., individuals that did not exit the first pond,  
122 was significantly higher in residents than in migrants (55% in residents vs. 28.6% in migrants, odds ratio=3.02,  
123  $p=0.007$ ).

124 In Experiment-2, as in Experiment-1, residents moved consistently less between ponds than migrants  
125 (Fig.2d). Furthermore, fish moved more between ponds in the presence of flow and the trend was slightly  
126 stronger for residents than migrants (Fig.2d; significant *Origin*×*Treatment* effect in Table 1). Individual  
127 movement tendency between ponds was moderately repeatable across ecological contexts but very weakly  
128 correlated over social contexts (Supp. info. 3.). However, we clearly see from Figure 2 and Table 1 that the  
129 difference between residents and migrants was maintained across different contexts.

130

## 131 Discussion

132 We have previously shown that ~50 years of isolation potentially led to rapid behavioural and morphological  
133 divergence of residents from migrants (7), which mimics the divergence observed in another long-isolated  
134 population of sticklebacks (16). Both studies assayed individual movement tendencies under artificial housing  
135 conditions in the lab and showed counter-intuitive patterns: residents showed either higher (7) or inconsistent  
136 patterns (16) in activity/exploration levels compared to migrants. Here, we show that the same populations as  
137 in (7) exhibited movement tendencies as predicted previously, when they were tested in a semi-natural setting  
138 (relevant social/ecological context and spatial scale): Resident populations exhibited lower movement  
139 tendencies than their migrant counterparts. These differences, detected only at large spatial scale, remained  
140 consistent across ecological and social contexts. Together with the previous results on F1 lab-born juveniles  
141 (8), this study suggests that our mesocosm setup, by allowing water flow, testing in groups and larger spatial  
142 scale (~15m length), is much better suited to characterize individual movement patterns related to migratory  
143 behaviour than lab-based assays in social isolation in small tanks.

144 Our study reveals that the detection of population differences in stickleback behaviour was scale-  
145 dependent (only detectable between, but not within ponds). This is probably because in the wild, sticklebacks  
146 exhibit considerable foraging movements over days (median of 40m upstream, (17)) and hence their within-  
147 pond movements, representing foraging movements, may not differ between populations. However, wild  
148 migrants in our field system travel 10s of kilometres inland within a few days (Pers. comm. from water  
149 authorities) and thus require sufficient space and navigation cues (e.g. flow velocity (14)) to express their  
150 natural behaviour.

151 Tests in the lab, though invaluable for studies on animal behaviour owing to controlled settings, are  
152 not without drawbacks. Firstly, they cannot offer the more natural conditions mentioned above (e.g. spatial  
153 scale, appropriate social or ecological contexts), which may be particularly important for wild-caught animals.  
154 They may constrain the level of behavioural expression to some extent, such as the ‘freezing’ behaviour of  
155 wild-caught migrants in our previous studies (7). Reassuringly, we observed that this was much less of an  
156 issue for lab-bred animals: lab-born F1 juveniles did not freeze in lab tests and their movement-related  
157 behaviours measured in the lab and in the mesocosms positively correlated (Fig.S1). Secondly, lab-tests are

158 performed in highly-controlled or novel setups. This can lead to homogenization of behavioural expression  
159 (e.g. decreased variance over time (18)) or uncovering ‘cryptic’ behavioural variation (with novel behaviours  
160 and increased variance in behavioural expression (19)). We thus advocate using mesocosms or other semi-  
161 natural setups (e.g. 20–27), to bridge lab and field studies. They circumvent the mentioned drawbacks and  
162 provide valuable insights undetectable in classical behavioural setups, especially for wild populations.

163 Our results further support the idea that forced isolation in freshwater is followed by phenotypic  
164 changes as reported for sticklebacks isolated after the last glacial retreat (e.g. reduction in lateral plates and  
165 reduced swimming abilities (28–30)). Many of these morphological and behavioural changes are underlined  
166 by genetic differentiation and are true adaptations to a resident lifestyle (31,32). Additionally, we show that  
167 freshwater-induced phenotypic changes in sticklebacks can occur even on contemporary timescales (see also  
168 (33–35)) and can have a genetic component (8). Residents in our study populations are thus likely on a  
169 trajectory to losing their migration tendencies and already (partially) adapted to complete residency. Current  
170 conservation management includes building fishways to reconnect land-locked and migratory populations. In  
171 this context, it is important to consider that residents may be less likely to use fishways due to lowered  
172 migration tendencies. This may require a revision in the evaluation criteria for the success of these  
173 conservation efforts. An exciting future avenue will be to study to what extent and how quickly individual  
174 migration tendencies will be affected when the two populations reconnect.

## 175 176 **Ethics**

177 Wild animals were sampled using a fishing permit from *Rijksdienst voor Ondernemend Nederland* (the  
178 Netherlands) and an angling permit from the Hengelsportfederatie Groningen-Drenthe. Housing and testing  
179 of behaviours were in adherence to the project permit from the *Central Committee on Animal Experiments*  
180 (CCD, the Netherlands) under the licence number *AVD1050020174084*.



182 **Data accessibility**

183 Datasets are provided as electronic supplementary methods and we will be upload it to a data repository after  
184 acceptance.

185 **Authors' contributions**

186 AR: conceptualization, data collection, data curation, analysis, writing an original draft of the manuscript,  
187 review and editing the manuscript; JG: conceptualization, data collection, data curation, analysis, writing:  
188 review and editing the manuscript; MN: conceptualization, analysis, supervision and writing: review and  
189 editing the manuscript; FJW & TGGG: conceptualization, supervision and writing: review and editing the  
190 manuscript. All authors declare no competing interests and gave final approval for publication and agreed to  
191 be held accountable for the work performed herein.

192

193 **Funding**

194 This work is supported by the Adaptive Life PhD fellowship of the University of Groningen to AR, by  
195 fundings from European Research Council to FJW (ERC Advanced Grant No. 789240) and from the  
196 Netherlands Organization for Scientific Research to FJW and MN (NWO-ALW; ALWOP.668) and JG. This  
197 work was also supported by grants from the Gratama Foundation to AR (2020GR040), the Dr. J.L.Dobberke  
198 Foundation (KNAWWF/3391/1911), and the Waddenfonds (Ruim Baan voor Vissen 2).

199

200 **Acknowledgments**

201 We thank Dennis de Worst and Willem Diderich for help with fish care and advice on experimental design  
202 and other animal caretakers for looking after the sticklebacks. We thank Peter Paul Schollema from the Water  
203 Authorities Hunze en Aa's and Jeroen Huisman from van Hall Larenstein, University of Applied Sciences for  
204 help with catching sticklebacks.

205 **Figures and tables**

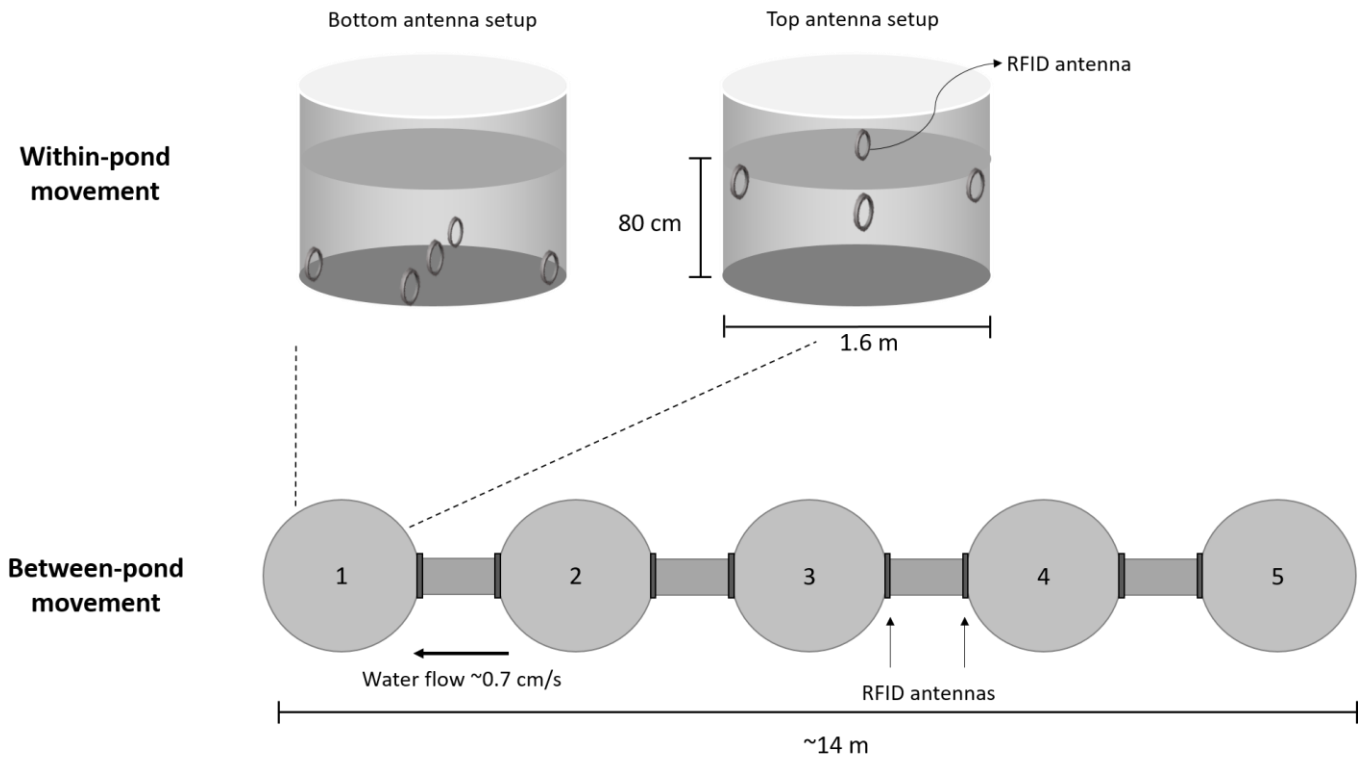

206

207 **Figure 1: Experimental setup.** The mesocosm consisted of two sets of five linearly connected ponds (1 to 5)

208 equipped with circular RFID antennas that automatically detect crosses of PIT tagged individuals. Fish were

209 released into pond 1. This pond was equipped with nine RFID antennas (five on the bottom and four on top

210 of the water column), allowing us to quantify within-pond movements. The connections between adjacent

211 ponds were equipped with two RFID antennas, allowing us to quantify the number and direction of movements

212 between ponds.

213

### Experiment-1

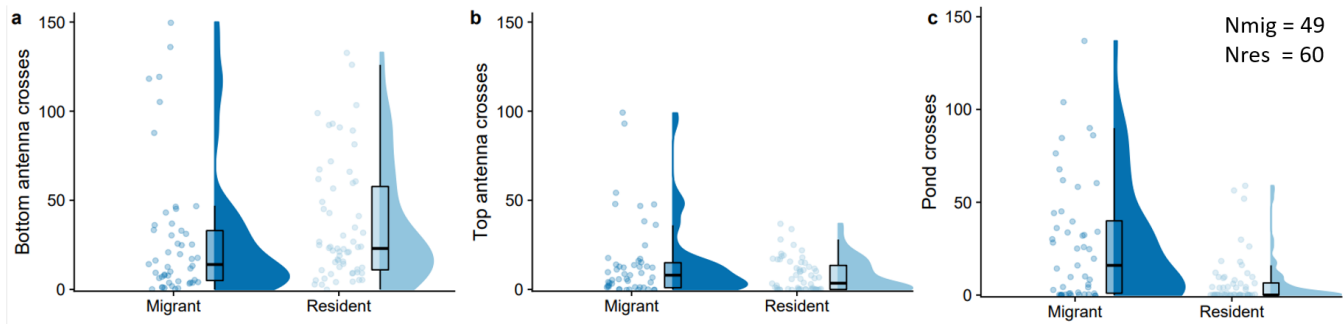

### Experiment-2

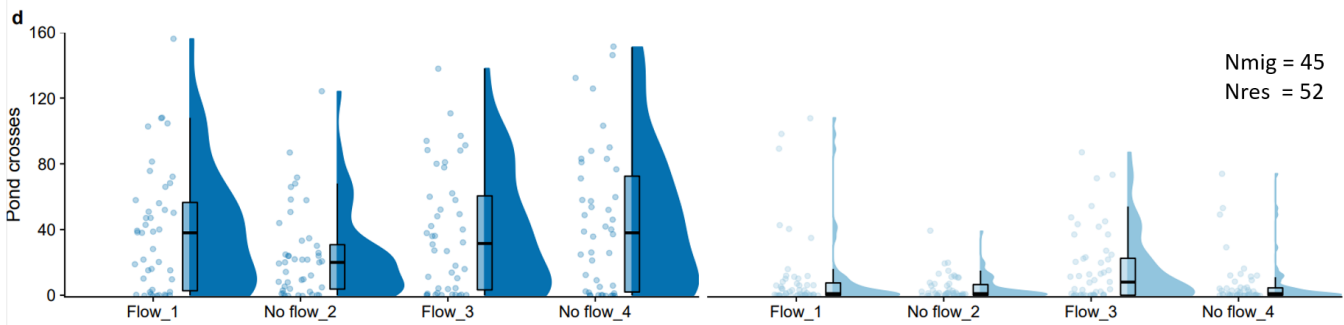

214  
215 **Figure 2: Within-pond and between-pond movement of resident and migrant sticklebacks.** a-b) within-  
216 ponds crosses at the bottom and top antennas respectively (Experiment-1); c) between-pond crosses in  
217 Experiment-1; d) between-pond crosses in relation to the daily flow treatment in Experiment-2. In all graphs,  
218 individual crosses (dots), boxplots and density kernels are shown for migrant (dark blue) and resident (light  
219 blue) sticklebacks.

220 **Table 1. Results of the statistical analysis of movement within and between ponds**  
 221 **using generalised linear mixed models.** Estimates of fixed effects ( $\beta$ ) in log-scale are  
 222 given with their 95% confidence intervals (CI) and variance components are given with  
 223 their standard deviation. Fixed effects that significantly differ from zero are denoted in  
 224 bold. Sample sizes experiment-1:  $N_{mig}=5$  groups (49 individuals),  $N_{res}=6$  groups (60  
 225 individuals); experiment-2:  $N_{mig}=1$  group (45 individuals),  $N_{res}=1$  group (52  
 226 individuals).

|                                              | Experiment-1             |                          |                             | Experiment-2                |
|----------------------------------------------|--------------------------|--------------------------|-----------------------------|-----------------------------|
|                                              | Bottom crosses           | Top crosses              | Pond crosses                | Pond crosses                |
| Fixed effects                                | $\beta$ (95% CI)         | $\beta$ (95% CI)         | $\beta$ (95% CI)            | $\beta$ (95% CI)            |
| Intercept                                    | <b>2.61 (2.13, 3.08)</b> | <b>1.98 (0.30, 3.63)</b> | <b>1.90 (0.63, 3.13)</b>    | <b>2.53 (1.87, 3.17)</b>    |
| Origin <sup>1</sup>                          | 0.51 (-0.12, 1.15)       | -0.68 (-3.03, 1.53)      | <b>-2.26 (-4.04, -0.58)</b> | <b>-1.77 (-2.68, -0.87)</b> |
| Treatment <sup>2</sup>                       | -                        | -                        | -                           | -0.14(-0.44, 0.16)          |
| Origin <sup>1</sup> × Treatment <sup>2</sup> | -                        | -                        | -                           | <b>-0.72 (-1.18, -0.27)</b> |
| Random effects                               | Var (sd)                 | Var (sd)                 | Var (sd)                    | Var (sd)                    |
| Group-ID                                     | 0.11 (0.33)              | 2.94 (1.72)              | 0.95 (0.98)                 | -                           |
| Obs                                          | 1.21 (1.10)              | 1.14 (1.07)              | 5.02 (2.24)                 | 0.81 (0.90)                 |
| Individual-ID                                | -                        | -                        | -                           | 4.11 (2.02)                 |

227 <sup>1</sup>'migrant' is used as reference category; <sup>2</sup>'flow' is used as reference category

228

## 229 **References**

- 230 1. Legrand D, Cote J, Fronhofer EA, Holt RD, Ronce O, Schtickzelle N, Travis JM, Clobert J. Eco-  
231 evolutionary dynamics in fragmented landscapes. *Ecography*. 2017;40:9–25.
- 232 2. Soriano-Redondo A, Gutiérrez JS, Hodgson D, Bearhop S. Migrant birds and mammals live faster  
233 than residents. *Nat Commun*. 2020;11(1):1–8.
- 234 3. Quinn TP, Myers KW. Anadromy and the marine migrations of Pacific salmon and trout: Rounsefell  
235 revisited. *Rev Fish Biol Fish*. 2004;14(4):421–42.
- 236 4. Closs GP, Hicks AS, Jellyman PG. Life histories of closely related amphidromous and non-migratory  
237 fish species: a trade-off between egg size and fecundity. *Freshw Biol*. 2013;58(6):1162–77.
- 238 5. Dodson JJ, Aubin-Horth N, Thériault V, Páez DJ. The evolutionary ecology of alternative migratory  
239 tactics in salmonid fishes. *Biol Rev*. 2013;88(3):602–25.
- 240 6. Augspurger JM, Warburton M, Closs GP. Life-history plasticity in amphidromous and catadromous  
241 fishes: a continuum of strategies. *Rev Fish Biol Fish*. 2017;27(1):177–92.
- 242 7. Ramesh A, Groothuis TGG, Weissing FJ, Nicolaus M. Habitat fragmentation induces rapid  
243 divergence of migratory and isolated sticklebacks. *Behav Ecol*. 2022; 33(1):167-77.
- 244 8. Ramesh A, Domingues MM, Stamhuis EJ, Groothuis TGG, Weissing FJ, Nicolaus M. Does genetic  
245 differentiation underlie behavioral divergence in response to migration barriers in sticklebacks? A  
246 common garden experiment. *Behav Ecol Sociobiol*. 2021;75(12):1-2.
- 247 9. Burns JG, Saravanan A, Helen Rodd F. Rearing environment affects the brain size of guppies: Lab-  
248 reared guppies have smaller brains than wild-caught guppies. *Ethology*. 2009;115(2):122–33.
- 249 10. Calisi RM, Bentley GE. Lab and field experiments: Are they the same animal? *Horm Behav*.  
250 2009;56(1):1–10.
- 251 11. Niemelä PT, Dingemanse NJ. Artificial environments and the study of ‘adaptive’ personalities.  
252 *Trends Ecol Evol*. 2014;29(5):245–7.

- 253 12. Pritchard DJ, Hurly TA, Tello-Ramos MC, Healy SD. Why study cognition in the wild (and how to  
254 test it)? *J Exp Anal Behav.* 2016;105(1):41–55.
- 255 13. Krause J, Krause S, Arlinghaus R, Psorakis I, Roberts S, Rutz C. Reality mining of animal social  
256 systems. *Trends Ecol Evol.* 2013;28(9):541–51.
- 257 14. Jonsson N. Influence of water flow, water temperature and light on fish migration in rivers. *Nord J*  
258 *Freshw Res.* 1991;66:20–35.
- 259 15. Harrison XA. Using observation-level random effects to model overdispersion in count data in  
260 ecology and evolution. *PeerJ.* 2014;2:e616
- 261 16. Di-Poi C, Lacasse J, Rogers SM, Aubin-Horth N. Extensive Behavioural Divergence following  
262 Colonisation of the Freshwater Environment in Threespine Sticklebacks. *PLoS One.*  
263 2014;9(6):e98980.
- 264 17. Bolnick DI, Snowberg LK, Patenia C, Stutz WE, Ingram T, Lau OL. Phenotype-dependent native  
265 habitat preference facilitates divergence between parapatric lake and stream stickleback. *Evolution.*  
266 2009;63(8):2004–16.
- 267 18. Sommer-Trembo C, Petry AC, Gomes Silva G, Vurusic SM, Gismann J, Baier J, Krause S, Iorio JD,  
268 Riesch R, Plath M. Predation risk and abiotic habitat parameters affect personality traits in  
269 extremophile populations of a neotropical fish (*Poecilia vivipara*). *Ecol Evol.* 2017;7:6570–81.
- 270 19. Schlichting CD. Hidden reaction norms, cryptic genetic variation, and evolvability. *Ann N Y Acad*  
271 *Sci.* 2008;1133(1942):187–203.
- 272 20. Niemelä PT, Tiso S, Dingemanse NJ. Density-dependent individual variation in male attractiveness in  
273 a wild field cricket. *Behav Ecol.* 2021;32(4):707–16.
- 274 21. Dhellemmes F, Finger JS, Laskowski KL, Guttridge TL, Krause J. Comparing behavioural syndromes  
275 across time and ecological conditions in a free-ranging predator. *Anim Behav.* 2020;162:23–33.
- 276 22. Coates WD, Hale R, Morrongiello JR. Dispersal decisions and personality in a freshwater fish. *Anim*  
277 *Behav.* 2019 Nov 1;157:209–18.

- 278 23. Schirmer A, Herde A, Eccard JA, Dammhahn M. Individuals in space: personality-dependent space  
279 use, movement and microhabitat use facilitate individual spatial niche specialization. *Oecologia*.  
280 2019;189(3).
- 281 24. Thorlacius M, Brodin T. Investigating large-scale invasion patterns using-small scale invasion  
282 successions—phenotypic differentiation of the invasive round goby (*Neogobius melanostomus*) at  
283 invasion fronts. *Limnol Oceanogr*. 2018;63(2):702–13.
- 284 25. Hirsch PE, Thorlacius M, Brodin T, Burkhardt-Holm P. An approach to incorporate individual  
285 personality in modeling fish dispersal across in-stream barriers. *Ecol Evol*. 2017;7(2):720–32.
- 286 26. Thorlacius M, Ellström GH, Brodin T. Behavioral dependent dispersal in the invasive round goby  
287 *Neogobius melanostomus* depends on population age. 2015;61(3):529–42.
- 288 27. Sudo R, Tsukamoto K. Migratory Restlessness and the Role of Androgen for Increasing Behavioral  
289 Drive in the Spawning Migration of the Japanese eel. *Sci Rep*. 2015 Nov 30;5(1):17430.
- 290 28. Dalziel AC, Vines TH, Schulte PM. Reductions in prolonged swimming capacity following  
291 freshwater colonization in multiple threespine stickleback populations. *Evolution*. 2012;66:1226–39.
- 292 29. Kitano J, Ishikawa A, Kume M, Mori S. Physiological and genetic basis for variation in migratory  
293 behavior in the three-spined stickleback, *Gasterosteus aculeatus*. *Ichthyol Res*. 2012;59(4):293–303.
- 294 30. Tudorache C, Blust R, Boeck G De. Swimming capacity and energetics of migrating and non-  
295 migrating morphs of three-spined stickleback *Gasterosteus aculeatus* L. and their ecological  
296 implications. *J Fish Biol*. 2007;71(5):1448–56.
- 297 31. Chan YF, Marks ME, Jones FC, Villarreal G, Shapiro MD, Brady SD, et al. Adaptive evolution of  
298 pelvic reduction in sticklebacks by recurrent deletion of a *Pitx1* Enhancer. *Science*.  
299 2010;327(5963):302–5.
- 300 32. Colosimo PF, Hosemann KE, Balabhadra S, Villarreal Jr G, Dickson M, Grimwood J, Schmutz J,  
301 Myers RM, Schluter D, Kingsley DM. Widespread parallel evolution in sticklebacks by repeated  
302 fixation of Ectodysplasin alleles. *Science*. 2005;307:1928–33.

- 303 33. Lescak EA, Bassham SL, Catchen J, Gelmond O, Sherbick ML, Van Hippel FA, et al. Evolution of  
304 stickleback in 50 years on earthquake-uplifted islands. *Proc Natl Acad Sci.* 2015;112(52):E7204–12.
- 305 34. Hosoki T, Mori S, Nishida S, Kume M, Sumi T, Kitano J. Diversity of gill raker number and diets  
306 among stickleback populations in novel habitats created by the 2011 Tōhoku earthquake and tsunami.  
307 *Evol Ecol Res.* 2019;20:213–30.
- 308 35. Garcia-Elfring A, Paccard A, Thurman TJ, Wasserman BA, Palkovacs EP, Hendry AP, et al. Using  
309 seasonal genomic changes to understand historical adaptation to new environments: Parallel selection  
310 on stickleback in highly-variable estuaries. *Mol Ecol.* 2021;30(9):2054–64.
